# Supplementary material for: Mitochondrial Genome Evolution, Genetic Diversity, and Population Structure in British Water Voles (Arvicola amphibius)
Source: PubMed Central journal article supplement (PMC7910943; doi:10.3390/genes12020138), 2021-01-21
Supplement: genes-12-00138-s001.pdf [file genes-12-00138-s001.pdf]

### Supplementary Materials:

**Table S1:** Arvicolinae and outgroup mitochondrial genome accession numbers.

| <b>Species Name</b>                 | <b>Accession Number</b> |
|-------------------------------------|-------------------------|
| <i>Lasiopodomys brandtii</i>        | MN614478.1              |
| <i>Lasiopodomys mandarinus</i>      | JX014233.1              |
| <i>Lasiopodomys gregalis</i>        | MN199169.1              |
| <i>Microtus fortis fortis</i>       | JF261174.1              |
| <i>Microtus fortis calamorum</i>    | JF261175.1              |
| <i>Microtus kikuchii</i>            | AF348082.1              |
| <i>Neodon irene</i>                 | NC016055.1              |
| <i>Neodon fuscus</i>                | MG833880.1              |
| <i>Neodon sikimensis</i>            | KU891252.1              |
| <i>Microtus rossiaemeridionalis</i> | DQ015676.1              |
| <i>Microtus levis</i>               | NC008064.1              |
| <i>Microtus arvalis</i>             | MG948434.1              |
| <i>Terricola subterraneus</i>       | MN326850.1              |
| <i>Microtus agrestis</i>            | MH152570.1              |
| <i>Microtus richardsoni</i>         | MT225016.1              |
| <i>Microtus ochrogaster</i>         | KT166982.1              |
| <i>Proedromys liangshanensis</i>    | FJ463038.1              |
| <i>Arvicola amphibius</i>           | MN122828.1              |
| <i>Myodes regulus</i>               | NC016427.1              |
| <i>Myodes rufocanus</i>             | KT725595.1              |
| <i>Myodes rutilus</i>               | MK482363.1              |
| <i>Myodes glareolus</i>             | KF918859.1              |
| <i>Eothenomys melanogaster</i>      | KP997311.1              |
| <i>Eothenomys miletus</i>           | KX014874.1              |
| <i>Eothenomys chinensis</i>         | FJ483847.1              |
| <i>Eothenomys Inez</i>              | KU200225.1              |
| <i>Ondatra zibethicus</i>           | KU177045.1              |
| <i>Dicrostonyx hudsonius</i>        | KX683880.1              |
| <i>Dicrostonyx groenlandicus</i>    | KX712239.1              |
| <i>Dicrostonyx torquatus</i>        | MN792940.1              |
| <i>Prometheomys schaposchnikowi</i> | NC049036.1              |
| <i>Cricetulus griseus</i>           | DQ390542.2              |
| <i>Peromyscus polionotus</i>        | KY707301.1              |
| <i>Sigmodon hispidus</i>            | KY707311.1              |
| <i>Mus musculus</i>                 | V00711.1                |

**Table S2:** Sequenced Wildwood Trust water vole samples.

| Sample No. | Sample Type | Enclosure No. | Local ID | Sex    |
|------------|-------------|---------------|----------|--------|
| 1          | Tissue      | TB31          | -        | -      |
| 2          | Tissue      | WW46          | -        | -      |
| 3          | Tissue      | WW0304/34     | -        | Male   |
| 4          | Tissue      | WW34/39       | -        | -      |
| 5          | Hair        | Q88           | -        | Male   |
| 6          | Hair        | Q100          | -        | Male   |
| 7          | Hair        | R95           | -        | Male   |
| 8          | Hair        | R12           | -        | Male   |
| 9          | Hair        | R28           | -        | Male   |
| 10         | Hair        | Q100          | -        | Male   |
| 11         | Faecal      | R2            | 2228     | Male   |
| 12         | Faecal      | Q52           | 2245     | Female |
| 13         | Faecal      | Q42           | 2218     | Female |
| 14         | Faecal      | Q7            | 2264     | Female |
| 15         | Faecal      | Q75a          | 2326     | Female |
| 16         | Faecal      | R50           | 2232     | Male   |
| 17         | Faecal      | R51           | 2225     | Male   |
| 18         | Faecal      | Q58           | 2314     | Male   |
| 19         | Faecal      | Q100          | 2185     | Female |
| 20         | Faecal      | R27           | 2445     | Female |

**Table S3:** Additional water vole sequences from previous publications.

| Sequence Description                  | Publication                 |
|---------------------------------------|-----------------------------|
| Modern South East and East of England | Baker 2015                  |
| Modern British and European           | Piertney <i>et al.</i> 2005 |
| Modern and Ancient                    | Brace <i>et al.</i> 2016    |

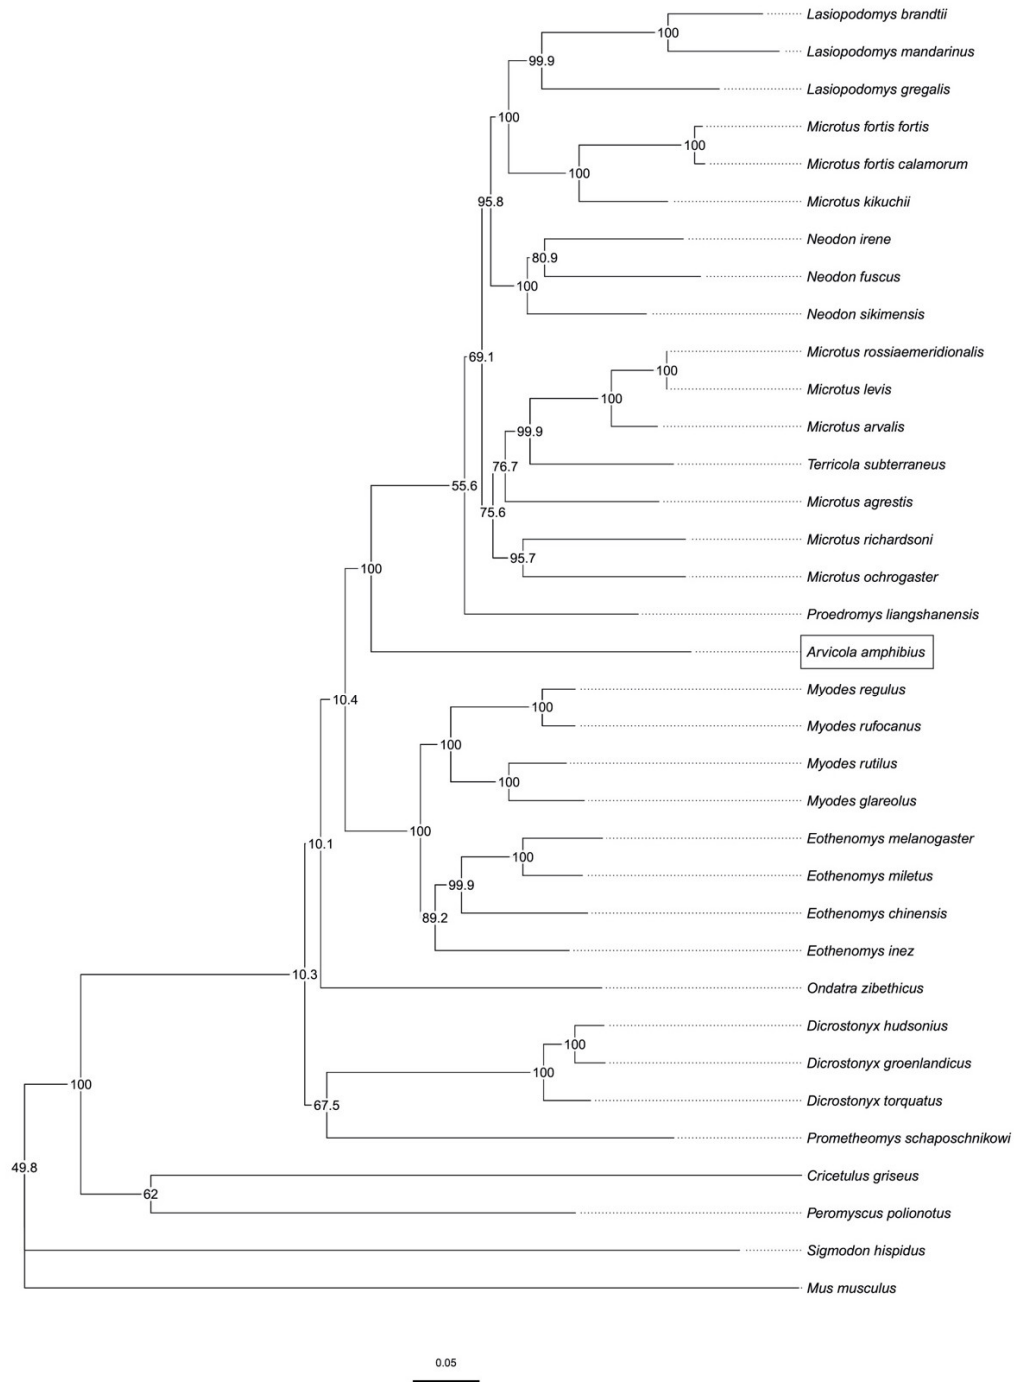

**Supplementary Figure 1:** ML phylogenetic tree of all available mtDNA genomes for Arvicolinae, rooted on the outgroup taxon *Mus musculus*. A single partition was considered.

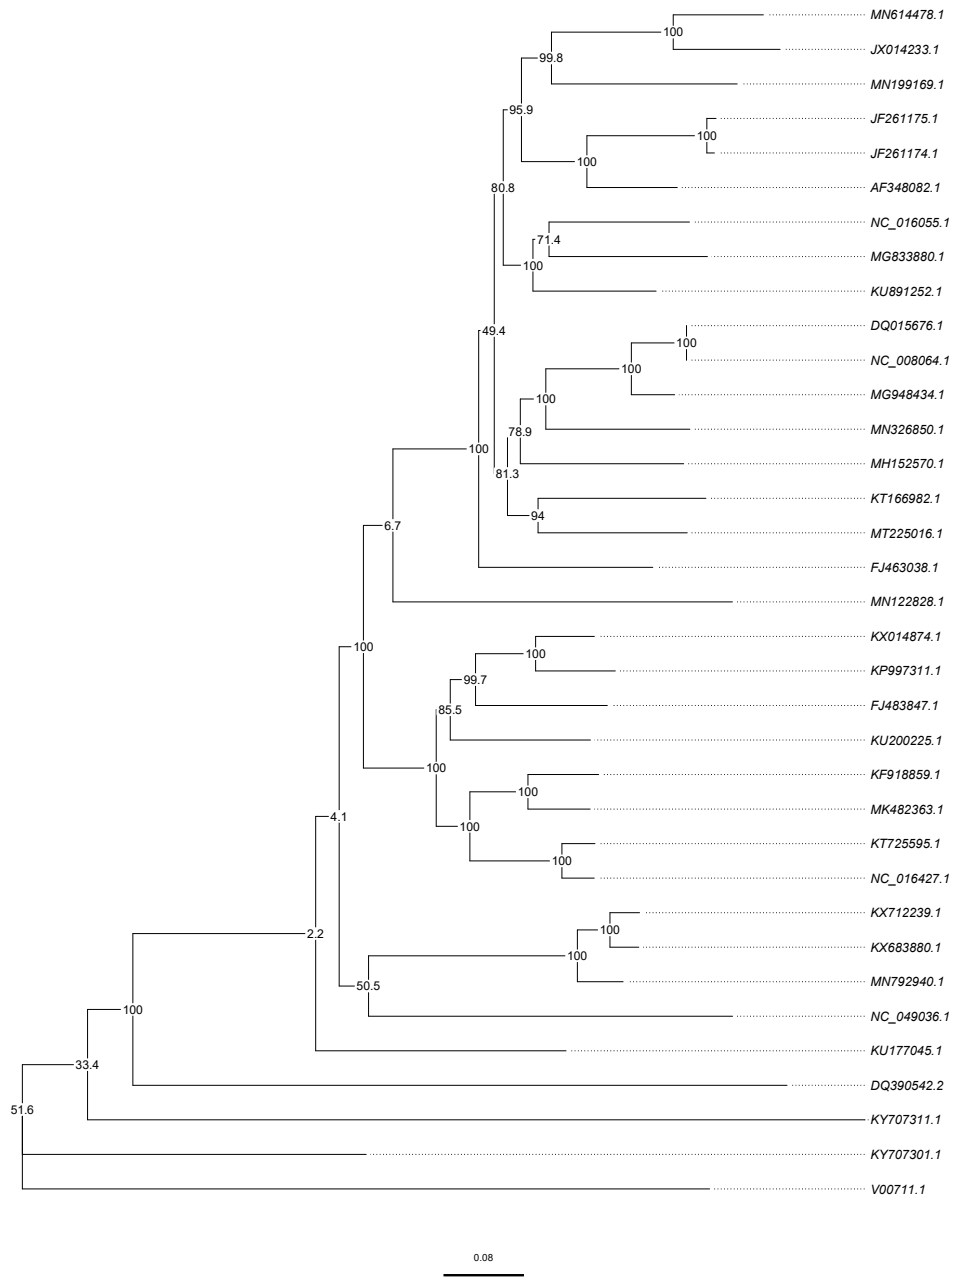

**Supplementary Figure 2:** ML phylogenetic tree of the 13 protein-coding genes in the mitochondrial genome for Arvicolinae, rooted on the outgroup taxon *Mus musculus*. Genes were modelled independently using PartitionFinder.
